# Supplementary material
Source: PubMed Central journal article supplement (PMC2996444)
Supplement: 1008894107_pnas.1008894107_SI.pdf [file 1008894107_pnas.1008894107_SI.pdf]

# Supporting Information

Schorr et al. 10.1073/pnas.1008894107

## SI Text

**Cloning, Protein Expression, and Purification.** The DNA sequence coding for residues 1–513 of the DNA Polymerase  $\eta$  from *Saccharomyces cerevisiae* was PCR amplified (forward primer 5' GGG GAC AAG TTT GTA CAA AAA AGC AGG CTT CAT GTC AAA ATT TAC TTG GAA GGA G 3' reverse primer 5' GGG GAC GAC TTT GTA CAA GAA AGC TGG GTC TCA TTT TTG TAA ATC TAT AAT ATC GAA ATT AG 3') and cloned in a two-step Gateway® reaction via the vector pDONR201 (Invitrogen) into the expression vector pDEST007, in frame with an N-terminal *Strep-Tag II* (IBA). The enzyme was expressed in *Escherichia coli* (Rosetta, Novagen) cells grown in Terrific Broth (TB)-medium at 37 °C supplemented with carbenicillin (100  $\mu$ g/mL) and chloramphenicol (5  $\mu$ g/mL) until an  $OD_{600} = 1.0$  was reached. Expression was induced by adding anhydrotetracycline to a final concentration of 200 ng/mL and the incubation was continued at 16 °C for 4–5 h. Cells were harvested

by centrifugation, resuspended in lysis buffer [100 mM Tris-HCl pH 8.0, 150 mM NaCl, 1 mM ethylenediaminetetraacetic (EDTA)] with a cocktail of protease inhibitors (Roche) added, and lysed using a high pressure homogenizer (Avestin Europe GmbH). The cell lysate was cleared by centrifugation and applied onto a Strep-Tactin column (IBA). The protein was eluted from the column with the same buffer containing 2.5 mM desthiobiotin. The fractions were pooled and concentrated in 50 mM Tris-HCl pH 7.6, 100 mM NaCl, 1 mM EDTA, 5 mM DTT, 5% glycerol and loaded onto a HiTrap Heparin column (GE Healthcare). The protein was eluted with a linear gradient of the same buffer containing 800 mM NaCl. The buffer was exchanged to 20 mM Tris-HCl pH 7.6, 50 mM KCl, 10 mM  $\beta$ -mercaptoethanol, 10% glycerol using centrifugal filter devices (Millipore). The enzyme was stored at a concentration of 10 mg/mL at –80 °C.

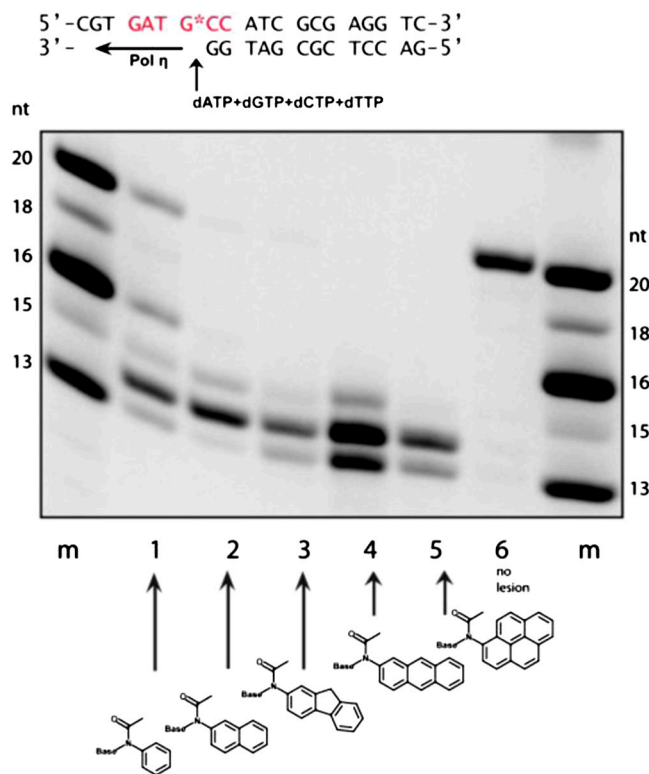

**Fig. S1.** Primer extension reaction with various bulky adducts in the same sequence context at lower enzyme concentrations than shown in Fig. 2A in the main text. Reaction conditions are 150 nM Pol  $\eta$ , 1  $\mu$ M template DNA, 200  $\mu$ M deoxynucleotides, and 5 min incubation, 30 °C. 1 = AAB-dG, 2 = AAN-dG, 3 = AAF-dG, 4 = AAA-dG, 5 = AAP-dG, and 6 = undamaged template strand. Here all bulky adducts except the small AAB-dG adduct (lane 1), are a strong block for Pol  $\eta$ . The polymerase inserts the next base opposite the lesions (dCTP) but extension from the lesions is problematic. Only for the benzene adduct, the 20mer full extension product is observed.





**Table S1. Data collection, processing, and structure refinement statistics**

|                                                     | Pol η—AAA-dG                             | Pol—AAF-dG                               |
|-----------------------------------------------------|------------------------------------------|------------------------------------------|
| <i>Data collection</i>                              |                                          |                                          |
| Space group                                         | <i>P</i> 4 <sub>1</sub> 2 <sub>1</sub> 2 | <i>P</i> 4 <sub>1</sub> 2 <sub>1</sub> 2 |
| Cell dimensions                                     |                                          |                                          |
| <i>a</i> , <i>b</i> , <i>c</i> (Å)                  | 103.5, 103.5, 292.7                      | 103.44, 103.44, 292.35                   |
| $\alpha$ , $\beta$ , $\gamma$ (°)                   | 90, 90, 90                               | 90, 90, 90                               |
| Wavelength (Å)                                      | 0.919                                    | 0.9129                                   |
| Resolution (Å)                                      | 48.0 - 2.7 (2.85-2.7)                    | 49-2.7 (2.85-2.7)                        |
| <i>R</i> <sub>merge</sub>                           | 0.067 (0.377)                            | 0.107 (0.523)                            |
| Mean <i>I</i> / $\sigma$ <i>I</i>                   | 23.0 (6.0)                               | 26.84 (5.99)                             |
| No. of observations                                 | 215,900 (30,490)                         | 584,408 (92,986)                         |
| No. of unique reflections                           | 44,732 (6,421)                           | 44,372 (6,887)                           |
| Completeness (%)                                    | 99.9 (99.8)                              | 98.2 (96.5)                              |
| Redundancy                                          | 4.8 (4.7)                                | 13.1 (13.6)                              |
| <i>Refinement</i>                                   |                                          |                                          |
| Resolution (Å)                                      | 46.6 - 2.7                               | 48.76 - 2.7                              |
| No. reflections                                     | 42,326                                   | 44,599                                   |
| <i>R</i> <sub>work</sub> / <i>R</i> <sub>free</sub> | 21.5/25.6                                | 22.0/27.2                                |
| No. atoms                                           | 9,076                                    | 9,070                                    |
| Protein                                             | 8,147                                    | 8,152                                    |
| DNA                                                 | 826                                      | 824                                      |
| Waters                                              | 103                                      | 89                                       |
| Ions                                                | 6 calcium                                | 6 calcium                                |
| <i>B</i> -factors                                   |                                          |                                          |
| Protein                                             | 45.0                                     | 29.6                                     |
| DNA                                                 | 65.3                                     | 45.1                                     |
| Waters                                              | 36.0                                     | 20.5                                     |
| rmsd                                                |                                          |                                          |
| Bond lengths (Å)                                    | 0.0126                                   | 0.0120                                   |
| Bond angles (°)                                     | 1.439                                    | 1.442                                    |

Numbers in parentheses correspond to the high resolution shell.
